# Supplementary material
Source: publisher figshare collection journal article supplement (https://geolsoc.figshare.com/ndownloader/files/25672644)
Supplement: Supplementary file 1 [file 25672644]

## Sheet: Table S1
		SiO2	FeO	MgO	CaO	Total
	Average value (n=10)	40.6944	10.2034	48.6418	0.09422	99.6339
	Relative error (%)	0.42039	0.262062	0.280949	1.26256	0.299939
	Prefered value	40.74	10.17	48.79	0.0963	100.155
	Relative precision (%)	-0.111856	0.328712	-0.30373	-2.15992	-0.520701

## Sheet: Table S2
	Table S2 Standard glass compositions (BT-1G and BIR-1G) determined by LA-ICP-MS in this study
		TB-1G (n=16)				BIR-1G (n=17)
		Average value	Relative error (%)	Prefered value	Relative precision (%)	Average value	Relative error (%)	Prefered value	Relative precision (%)
	Li	17.7093	3.66346	23.1	-23.3363	2.71576	14.4284	3	-9.47458
	Al2O3	17.0414	0.767605	16.89	0.896399	14.3834	0.738877	15.5	-7.20368
	Sc	23.9458	2.30259	22.8	5.02565	40.3717	1.75224	43	-6.11224
	TiO2	0.884126	1.10342	0.86	2.80535	0.893039	1.04038	1.04	-14.1308
	V	194.027	1.04572	189.2	2.55101	306.855	1.04466	326	-5.8727
	Cr	61.3547	5.5036	60	2.25781	382.27	1.72693	392	-2.48204
	MnO	0.192484	0.639611	0.19	1.30754	0.172226	0.846803	0.19	-9.35495
	FeO	8.89374	1.3359	8.67	2.58063	10.4683	1.04895	10.4	0.656861
	Co	25.0188	1.46618	23.5	6.46296	54.7202	1.13398	52	5.23123
	Ni	17.9093	7.57986	18.75	-4.48349	178.569	2.05172	178	0.319589
	Zn	101.175	3.23023	102.3	-1.09983	67.3926	1.85422	78	-13.5992

## Sheet: Table S3
	Table S3 Olivine chemistry of the Datong basalts measured by EPMA and LA-ICP-MS
	Rock type	Sample name	Measured point	EPMA								LA-ICP-MS
				SiO2	MgO	FeO	CaO	total	Fo	Ca	100Ca/Fe	Al	Ti	Fe	Mg	Mn	Li	Sc	V	Cr	Co	Ni	Zn	Fo	Fe/Mn	Mn/Zn	Zn/Fe	100 Mn/Fe
	Alkaline basalts	DT1	DT1-3	39.0445	42.1086	17.8773	0.2174	99.2478	80.7642	1553.75	1.11812	145.033	75.8544	123710	253925	1585	1.84149	5.34078	6.11675	204.568	169.151	2034.96	148.247	82.506	78.0505	10.6917	11.9834	1.28122
			DT1-4	39.7512	44.0197	16.0258	0.2091	100.006	83.0402	1494.43	1.19968	178.56	87.6247	119462	265449	1533.91	2.71218	4.79182	6.52931	193.546	166.954	2339.11	140.036	83.6217	77.8806	10.9537	11.7222	1.28402
			DT1-5	39.349	42.2652	17.5677	0.2228	99.4047	81.0912	1592.34	1.16608	178.181	88.0973	123405	254869	1583.96	1.84071	5.09952	6.16402	190.543	168.972	2015.17	143.245	82.5951	77.9092	11.0577	11.6077	1.28355
			DT1-12	39.3516	42.5876	17.392	0.2257	99.5569	81.3603	1613.07	1.1932	172.373	84.1969	126736	256813	1662.63	2.84082	4.69533	6.27803	202.019	165.236	1957.66	164.371	82.3197	76.2267	10.1151	12.9695	1.31188
			DT1-21	39.4194	43.8953	15.4329	0.2004	98.948	83.5256	1432.25	1.19393	199.234	93.2573	120787	264699	1528.75	2.62329	5.07701	6.59773	202.628	168.419	2361.7	137.619	83.431	79.0101	11.1086	11.3936	1.26566
			DT1-27	39.3267	43.6506	15.8456	0.2113	99.0342	83.0808	1510.15	1.22609	181.321	86.682	120526	263223	1512.25	2.40333	5.15501	6.84467	203.01	171.03	2411.39	144.457	83.3835	79.6998	10.4685	11.9856	1.25471
			DT1-30	39.294	43.0771	16.6263	0.2166	99.214	82.2013	1548.03	1.19782	183.133	88.1781	122054	259765	1542.41	1.94103	5.29609	7.0091	205.675	168.831	2336.13	142.812	83.0226	79.132	10.8003	11.7008	1.26371
			DT1-37	39.5497	43.7034	16.2512	0.2125	99.7168	82.7399	1518.73	1.20227	191.212	92.3185	123181	263542	1568.53	2.7281	5.09671	6.69539	200.712	170.033	2391.17	146.259	83.0964	78.5329	10.7243	11.8735	1.27335
			DT1-38	39.7344	44.0135	15.8914	0.2116	99.8509	83.1565	1512.3	1.22429	182.814	83.1809	120139	265412	1500.82	2.72838	5.17463	6.91222	201.646	168.42	2386.32	140.949	83.5422	80.0488	10.648	11.7321	1.24924
			DT1-40	39.0428	42.5115	17.3915	0.2141	99.1599	81.3336	1530.16	1.1319	193.121	98.7361	120110	256354	1535.65	3.20032	5.00616	6.47699	199.928	163.831	2316.99	145.654	83.0626	78.2145	10.5431	12.1268	1.27854
			DT1-42	39.5284	43.8123	16.3069	0.2183	99.8659	82.7265	1560.18	1.23087	173.194	90.6553	122218	264198	1585.55	2.6737	5.07186	7.10174	210.869	171.638	2281.38	147.812	83.2411	77.0821	10.7268	12.0942	1.29732
			DT1-45	39.6093	43.5564	16.4124	0.2164	99.7945	82.55	1546.6	1.21231	194.809	91.0147	120247	262655	1522.17	2.20508	5.09687	6.52432	201.784	170.335	2322.54	140.223	83.3858	78.9969	10.8553	11.6613	1.26587
			DT1-47	39.5956	43.9812	15.9262	0.2125	99.7155	83.1156	1518.73	1.22681	167.798	80.0916	131624	265217	1668.43	2.60451	5.24981	6.5555	193.206	173.299	2338.99	173.396	82.2374	78.8911	9.62203	13.1736	1.26757
			DT1-48	39.8767	44.4985	15.5848	0.2045	100.165	83.5786	1461.55	1.20649	179.836	77.2575	120857	268336	1518.78	2.64486	5.0762	6.46014	195.215	172.773	2446.86	136.173	83.6108	79.5749	11.1533	11.2673	1.25668
			DT1-49	39.5149	43.5499	16.2537	0.2265	99.545	82.6873	1618.79	1.28129	209.294	91.2305	119680	262616	1578.4	2.21993	4.90987	6.38841	199.819	164.601	2054.57	138.883	83.449	75.8236	11.365	11.6045	1.31885
			DT1-54	39.2849	43.841	15.5621	0.2203	98.9083	83.3935	1574.47	1.3016	200.842	94.8528	120280	264372	1546.54	2.82776	5.10786	6.78808	200.191	172.097	2452.7	139.561	83.472	77.7735	11.0814	11.6031	1.28579
			DT1-51	39.7059	43.9636	15.8924	0.204	99.7659	83.1397	1457.98	1.18024	172.992	77.7119	121150	265111	1515.54	2.4965	5.10876	6.88061	197.576	169.486	2399.83	140.66	83.4109	79.9386	10.7745	11.6104	1.25096
			DT1-56	39.189	43.07	16.5435	0.21	99.0125	82.2719	1500.86	1.16714	197.228	91.3668	121350	259722	1551.93	2.17087	4.94373	6.82993	200.397	168.167	2330.35	143.375	83.1017	78.1926	10.8243	11.815	1.27889
			DT1-57	39.3373	43.4339	16.3262	0.2123	99.3097	82.5852	1517.3	1.19562	165.763	84.483	126644	261917	1600.41	2.73125	4.89172	6.85175	210.587	169.533	2096.16	142.154	82.6147	79.1323	11.2582	11.2247	1.26371
			DT1-58	39.1004	43.2219	16.051	0.2124	98.5857	82.7587	1518.01	1.2167	170.289	87.4271	119569	260638	1521.4	2.28161	4.70948	6.24155	182.287	164.738	2225.52	139.917	83.3573	78.5911	10.8736	11.7018	1.27241
			Average	39.4303	43.4381	16.358	0.213935	99.4403	82.555	1528.98	1.20362	181.851	87.2109	122186	261942	1558.15	2.48578	5.04496	6.61231	199.81	168.877	2274.97	144.79	83.1231	78.4351	10.7823	11.8426	1.2752
			Std	0.240522	0.651157	0.696586	0.00684792	0.422466	0.821433	48.9418	0.042399	14.9648	6.1455	3070.88	3926.63	46.6235	0.362847	0.176653	0.286615	6.60553	2.7189	155.026	8.9678	0.437467	1.13388	0.397386	0.484744	0.0186326
		DT14	DT14-1	38.7761	41.2094	18.9422	0.2266	99.1543	79.4997	1619.5	1.09992	166.043	141.138	154306	248502	2099.1	17.7057	4.5425	5.0009	141.906	181.645	1434.32	185.759	78.7251	73.5105	11.3002	12.0383	1.36035
			DT14-2	38.7735	41.0583	19.1386	0.2271	99.1975	79.2708	1623.07	1.09103	188.261	132.174	142181	247591	1813.78	7.20831	4.20545	5.09714	127.859	176.123	1760.36	168.564	80.0049	78.3892	10.7602	11.8556	1.27569
			DT14-3	38.7986	41.6391	18.6865	0.2012	99.3254	79.8875	1437.97	0.989988	175.849	138.944	143869	251094	1835.92	6.04336	4.4188	5.89192	142.609	177.298	1492.63	174.243	80.0407	78.3636	10.5365	12.1112	1.2761
			DT14-4	38.8515	41.4469	18.6839	0.2119	99.1942	79.8153	1514.44	1.04278	199.287	141.533	144240	249935	1855.61	5.94542	4.00186	5.49464	133.644	180.438	1829	172.268	79.9255	77.7314	10.7717	11.9432	1.28648
			DT14-6	38.7388	41.4389	18.8603	0.2103	99.2483	79.6604	1503.01	1.02523	197.478	146.645	143012	249886	1838.84	6.39044	4.03248	5.11383	130.56	180.625	1807.74	173.979	80.0591	77.773	10.5694	12.1653	1.28579
			DT14-7	38.7278	41.3175	18.7696	0.207	99.0219	79.691	1479.42	1.01402	164.431	125.678	142532	249154	1827.17	12.1483	4.2152	4.66086	126.424	179.323	1785.13	167.624	80.0659	78.0071	10.9004	11.7604	1.28193
			DT14-8	38.9247	41.6134	18.5913	0.2101	99.3395	79.9596	1501.58	1.03907	192.376	136.451	143699	250939	1840.08	4.05863	4.19318	5.55152	134.323	178.62	1830.84	167.686	80.0497	78.0937	10.9734	11.6693	1.28051
			DT14-9	38.9261	41.4959	18.7228	0.2139	99.3587	79.8009	1528.73	1.05044	194.555	136.15	143554	250230	1870.82	17.6506	4.21011	5.06752	128.751	180.971	1754.03	174.06	80.0206	76.7336	10.7481	12.1251	1.30321
			DT14-12	38.8401	41.5037	18.8702	0.2122	99.4262	79.6772	1516.58	1.03395	177.204	129.01	140915	250277	1822.58	5.23313	4.0176	4.83843	121.779	175.21	1804.95	166.873	80.3187	77.3163	10.9219	11.8421	1.29339
			DT14-13	38.8145	40.922	19.3985	0.2205	99.3555	78.9932	1575.9	1.04513	151.918	109.22	140217	246769	1808.63	15.9654	3.85833	4.91656	114.102	172.831	1674.31	166.724	80.1736	77.5268	10.848	11.8904	1.28988
			DT14-16	38.583	40.3992	19.9914	0.2448	99.2184	78.2713	1749.58	1.1259	178.283	145.613	142228	243617	1813.32	6.89686	4.12572	5.17499	130.309	175.21	1726.58	168.942	79.7393	78.4352	10.7334	11.8782	1.27494
			DT14-20	38.682	41.5006	18.7747	0.2114	99.1687	79.758	1510.87	1.03529	185.073	142.063	142631	250258	1831.31	8.25777	4.05732	5.47056	131.74	177.429	1775.92	171.366	80.1254	77.885	10.6866	12.0146	1.28394
			DT14-21	38.9079	41.2631	18.8781	0.2177	99.2668	79.5761	1555.89	1.0603	181.178	140.666	141848	248826	1836.76	6.31883	3.97894	5.19491	132.627	175.529	1754.84	170.637	80.1217	77.2272	10.7641	12.0296	1.29488
			DT14-25	38.8658	41.4189	18.5505	0.2168	99.052	79.9197	1549.46	1.07457	177.49	126.64	144308	249766	1843.31	13.2611	4.17055	4.81505	121.772	178.166	1769.71	171.605	79.907	78.287	10.7416	11.8916	1.27735
			DT14-28	39.0871	41.5348	18.5603	0.2086	99.3908	79.956	1490.86	1.03338	172.949	117.917	144143	250465	1849.08	15.2271	3.89931	5.52172	117.607	178.248	1828.82	171.221	79.9702	77.9539	10.7994	11.8786	1.28281
			DT14-29	38.9113	41.4875	18.8126	0.2129	99.4243	79.7204	1521.59	1.04054	177.987	114.333	141181	250179	1818.56	11.2991	3.95838	5.01444	120.946	176.281	1786.04	173.559	80.2827	77.6335	10.478	12.2934	1.2881
			DT14-31	39.053	41.7325	18.5454	0.2139	99.5448	80.0449	1528.73	1.06048	174.716	120.87	143816	251657	1836.81	4.13393	3.91533	5.36333	126.731	178.294	1866.93	169.816	80.0823	78.2968	10.8165	11.8079	1.27719
			DT14-32	38.993	41.54	18.6684	0.2093	99.4107	79.8648	1495.86	1.03084	168.978	136.018	147888	250496	1872.38	21.6289	3.84557	4.68289	133.473	182.581	1847.85	202.852	79.5581	78.984	9.23031	13.7165	1.26608
			Average	38.8475	41.3623	18.8581	0.215344	99.2832	79.6315	1539.06	1.0496	179.114	132.281	143698	249424	1850.78	10.2985	4.09148	5.15951	128.731	178.046	1751.67	173.21	79.9539	77.6749	10.6989	12.0506	1.2877
			Std	0.128021	0.313987	0.355289	0.00975851	0.138248	0.426181	69.7437	0.0322346	12.3359	11.0651	3144.26	1893.41	64.5358	5.43924	0.18818	0.333486	7.59002	2.58831	114.904	8.57938	0.353705	1.16415	0.408795	0.443937	0.0200911
		DT18	DT18-1	38.4771	40.0793	20.3853	0.1865	99.1282	77.8007	1332.91	0.841185	181.275	82.9543	152824	241688	1841.46	1.99707	4.59941	7.51179	190.626	181.531	2174.28	169.992	78.4195	82.9903	10.8326	11.1234	1.20496
			DT18-3	38.8272	40.5708	19.9061	0.1902	99.4943	78.4158	1359.35	0.878525	165.52	87.9795	156271	244651	1891.51	2.5663	4.60901	6.64545	182.931	181.178	1988.96	172.495	78.2477	82.6174	10.9656	11.0381	1.2104
			DT18-4	38.6118	39.582	21.1932	0.1862	99.5732	76.9011	1330.76	0.807817	153.921	87.2013	157556	238689	1835.3	2.31349	4.69822	7.24926	192.785	182.314	2117.09	179.252	77.6832	85.8472	10.2387	11.3771	1.16486
			DT18-5	38.6138	40.2068	20.2807	0.1883	99.2896	77.944	1345.77	0.853684	160.444	91.3721	161405	242456	1913.7	2.59989	4.72785	7.26435	182.578	185.043	1939.19	185.596	77.5359	84.3421	10.3111	11.4988	1.18565
			DT18-6	38.6496	40.4193	20.1467	0.1888	99.4044	78.1479	1349.35	0.861644	182.549	89.4977	155179	243738	1852.91	2.82894	4.55985	6.79812	197.57	181.805	2103.24	175.864	78.3034	83.7485	10.5361	11.333	1.19405
			DT18-18	38.4037	39.7873	20.7712	0.1853	99.1475	77.3472	1324.33	0.820245	164.196	85.5352	155588	239927	1829.66	1.88228	4.64621	7.0342	190.535	184.43	2191.29	175.66	77.9893	85.0366	10.4159	11.29	1.17596
			DT18-19	38.3812	39.7481	20.5456	0.1906	98.8655	77.5208	1362.21	0.85297	181.772	114.84	154630	239690	1887.19	2.68454	4.65084	6.8032	166.9	181.241	1915.13	179.168	78.0783	81.9365	10.5331	11.5869	1.22046
			DT18-22	38.5217	40.1109	20.2865	0.1873	99.1064	77.898	1338.63	0.848908	178.688	91.3701	161238	241878	1928.52	3.15364	5.1135	6.95076	190.869	188.071	2015.13	179.137	77.5124	83.6069	10.7656	11.1101	1.19607
			DT18-23	38.6724	40.3405	20.059	0.1871	99.259	78.1891	1337.2	0.857619	186.378	97.5223	150007	243263	1831.49	2.10764	4.66591	7.02141	188.097	180.139	2066.27	166.165	78.8412	81.9042	11.0221	11.0772	1.22094
			DT18-25	38.4766	39.5792	21.0848	0.1853	99.3259	76.9908	1324.33	0.808046	176.204	83.228	152573	238672	1835.96	2.92175	4.42321	7.23915	188.146	180.179	2101.26	170.065	78.2342	83.1023	10.7957	11.1465	1.20334
			DT18-26	38.5449	40.2361	20.2529	0.1831	99.217	77.9801	1308.61	0.831249	172.922	97.4787	154085	242633	1840.75	1.43633	4.76635	6.9507	198.034	180.638	2119.82	170.492	78.3464	83.7076	10.7967	11.0648	1.19463
			DT18-28	38.628	40.0185	20.4866	0.1849	99.318	77.6886	1321.47	0.829845	184.987	85.5417	156557	241321	1872.32	2.53789	4.50457	7.14728	197.405	183.436	2016.13	173.619	77.9822	83.6162	10.7841	11.0898	1.19594
			DT18-30	38.1796	39.5012	20.9067	0.1834	98.7709	77.1059	1310.75	0.806573	175.335	93.7596	153050	238202	1830.78	2.92069	4.84471	7.17514	196.708	180.924	2140.37	175.444	78.1473	83.5983	10.4351	11.4632	1.1962
			DT18-35	38.5278	40.2044	20.0966	0.187	99.0158	78.0994	1336.48	0.855557	172.616	102.719	157481	242442	1855.83	2.23172	4.90579	7.56586	195.343	186.17	2179.27	181.266	77.9607	84.8577	10.2382	11.5103	1.17844
			DT18-36	38.2445	39.76	20.5704	0.1848	98.7597	77.505	1320.76	0.826017	184.59	100.327	154243	239762	1864.17	2.17705	4.80961	7.77713	197.665	180.017	2100.26	175.285	78.1263	82.7407	10.6351	11.3642	1.20859
			DT18-38	38.2081	39.4595	20.8867	0.1858	98.7401	77.1042	1327.9	0.81791	149.96	86.2038	151524	237950	1862.26	2.82617	4.79479	6.47366	181.572	175.464	1948.13	175.901	78.3	81.366	10.5869	11.6088	1.22901
			DT18-39	37.8793	38.6275	22.1412	0.1894	98.8374	75.6681	1353.63	0.786518	139.574	170.976	158375	232933	1921.39	2.78073	4.49608	6.49531	145.024	178.873	1822.78	211.096	77.1659	82.4277	9.10194	13.3288	1.21318
			Average	38.4616	39.896	20.5882	0.186706	99.1325	77.5475	1334.38	0.834371	171.231	96.9709	155446	240582	1864.42	2.4686	4.69505	7.06487	187.223	181.85	2055.21	177.441	78.0514	83.3792	10.5291	11.4124	1.19957
			Std	0.22941	0.470078	0.546695	0.00220864	0.264021	0.665024	15.7851	0.0246103	13.6746	20.7797	3142.91	2834.68	33.0509	0.449967	0.169731	0.362243	13.5246	2.94662	104.885	9.88698	0.399372	1.19328	0.438676	0.53087	0.0171043
		DT20	DT20-6	38.8989	40.7577	20.0838	0.1773	99.9177	78.3431	1267.16	0.811695	207.717	104.883	156308	245779	1862.21	3.22435	6.85266	7.69612	207.076	186.406	2325.74	174.126	78.3219	83.9369	10.6946	11.14	1.19137
			DT20-10	38.9442	40.7237	20.1195	0.1889	99.9763	78.2988	1350.06	0.863266	183.629	86.1533	155623	245573	1851.74	2.95047	6.65233	6.4489	196.872	184.257	2096.6	171.778	78.3822	84.0415	10.7799	11.0381	1.18989
			DT20-11	38.8817	39.7311	21.4179	0.1891	100.22	76.7803	1351.49	0.811792	183.648	92.2792	159297	239588	1888.47	2.8761	7.19481	6.87822	202.854	185.799	1965.49	178.233	77.5576	84.3523	10.5955	11.1888	1.1855
			DT20-13	39.0576	40.8464	19.9398	0.1843	100.028	78.5016	1317.18	0.849835	177.566	82.2968	157046	246313	1857.91	3.04147	6.95469	7.39583	197.167	188.064	2340.3	174.424	78.2787	84.5286	10.6517	11.1065	1.18303
			DT20-14	38.773	40.2315	20.6076	0.1878	99.7999	77.6786	1342.2	0.837911	179.44	90.9266	158509	242605	1855.32	3.09682	6.63943	6.89962	199.537	186.256	2194.79	178.086	77.8603	85.4347	10.4181	11.2351	1.17048
			DT20-15	38.3388	39.5305	21.5878	0.1825	99.6396	76.5484	1304.32	0.777292	167.032	85.8411	160717	238378	1877.43	3.16162	6.59949	7.29431	181.758	189.601	2160.14	185.099	77.3141	85.6046	10.1428	11.5171	1.16816
			DT20-17	38.583	39.3031	21.6908	0.1919	99.7688	76.3589	1371.5	0.813447	181.194	94.2375	159334	237007	1898.33	2.93934	6.704	7.03045	208.554	185.531	1865.39	175.832	77.3644	83.9336	10.7963	11.0354	1.19142
			DT20-19	38.8488	40.4009	20.2714	0.1913	99.7124	78.0346	1367.21	0.867683	180.059	95.5286	161015	243627	1841.7	2.83415	6.84744	7.55057	201.589	185.84	2208.58	182.161	77.6617	87.4272	10.1103	11.3133	1.14381
			DT20-20	38.9778	40.6097	20.0839	0.186	99.8574	78.2812	1329.33	0.85152	173.114	98.0926	163613	244886	1934.33	2.91434	6.72611	7.75762	209.947	187.395	2050.33	181.624	77.4728	84.584	10.6502	11.1008	1.18226
			DT20-21	39.1463	40.9211	19.8786	0.1823	100.128	78.5842	1302.89	0.8432	191.675	105.271	157341	246764	1849.65	3.13198	7.11587	7.49367	217.2	187.135	2279.38	176.74	78.2779	85.0654	10.4654	11.2329	1.17557
			DT20-22	39.0947	41.212	19.5556	0.1926	100.055	78.9765	1376.5	0.905555	238.081	116.322	154358	248518	1864.14	3.00677	6.51086	7.06072	208.356	186.005	2296.02	173.566	78.7205	82.8039	10.7403	11.2444	1.20767
			DT20-23	38.8844	40.3019	20.5553	0.1867	99.9283	77.7529	1334.34	0.835123	193.789	96.9535	157003	243030	1845.35	2.86239	6.37018	6.94992	208.753	185.17	2125.64	182.506	78.0543	85.0803	10.1112	11.6243	1.17536
			DT20-25	39.0648	40.3992	20.5969	0.1896	100.251	77.7596	1355.06	0.846382	184.192	95.693	156280	243617	1839.68	3.03641	6.37396	7.18482	204.979	186.473	2126.38	180.454	78.1745	84.9493	10.1948	11.5469	1.17717
			DT20-26	38.9936	40.9335	19.9991	0.1882	100.114	78.4875	1345.06	0.865245	206.528	111.361	158256	246839	1865.43	3.10552	6.64159	8.2513	214.749	187.43	2147.88	176.46	78.1843	84.8363	10.5714	11.1502	1.17874
			DT20-27	39.0904	40.1785	20.7676	0.2133	100.25	77.5212	1524.45	0.944353	173.347	90.1437	154957	242286	1847.95	2.50072	6.33785	7.32341	199.082	180.766	1995.56	181.016	78.226	83.8537	10.2087	11.6817	1.19255
			DT20-28	38.8966	40.6225	20.3988	0.185	100.103	78.021	1322.19	0.833867	181.58	94.5575	160306	244963	1870.23	2.34569	6.47492	7.3822	205.899	187.693	2260.79	187.754	77.8327	85.7147	9.96108	11.7122	1.16666
			DT20-29	38.7332	40.214	20.8173	0.1951	99.9596	77.4949	1394.37	0.861713	176.894	103.974	164890	242500	1988.22	3.01752	6.81081	7.09888	195.786	187.309	1717.02	187.387	77.1648	82.9333	10.6102	11.3644	1.20579
			DT20-30	39.0966	41.0114	19.7273	0.1802	100.016	78.7495	1287.88	0.83988	200.015	106.192	156458	247308	1854.76	2.80107	6.49111	7.75243	214.062	185.18	2295.4	179.114	78.4108	84.3548	10.3551	11.4481	1.18547
			Average	38.9058	40.4405	20.4499	0.18845	99.9847	77.8985	1346.84	0.847764	187.75	97.2615	158406	243866	1871.83	2.93593	6.68323	7.30272	204.123	186.239	2136.19	179.242	77.9589	84.6353	10.4476	11.3156	1.18172
			Std	0.203532	0.520951	0.622544	0.00768966	0.180515	0.745277	54.9577	0.0368612	16.8296	9.1563	2872.72	3141.46	37.1997	0.221773	0.246311	0.417374	8.44822	1.85653	168.209	4.65193	0.446412	1.06902	0.267033	0.222117	0.0148254
		DT24	DT24-8	38.7056	40.1222	21.2115	0.1899	100.229	77.1258	1357.21	0.823159	225.259	141.69	165362	241946	2023.2	3.53205	6.43171	6.95641	144.9	189.837	1842.05	196.717	77.074	81.7329	10.2848	11.8961	1.2235
			DT24-9	38.9027	39.8651	21.2011	0.1916	100.16	77.0209	1369.36	0.830935	207.027	142.853	163989	240396	2016.63	3.66244	6.32702	6.88989	147.104	189.287	1844.18	193.983	77.1078	81.3183	10.3959	11.829	1.22973
			DT24-10	38.8346	40.0835	21.0883	0.1889	100.195	77.2114	1350.06	0.823607	219.224	144.142	162852	241713	2004.13	3.66859	6.22028	6.94806	145.76	187.369	1816.91	197.547	77.3263	81.2581	10.1451	12.1305	1.23065
			DT24-11	38.4354	39.1615	21.7713	0.1961	99.5643	76.2266	1401.52	0.828177	197.016	132.135	166186	236153	2053.3	3.24343	6.33801	6.55337	145.06	187.601	1646.05	196.209	76.554	80.9357	10.4648	11.8067	1.23555
			DT24-13	38.6621	39.7766	21.1302	0.1877	99.7566	77.0408	1341.48	0.816753	188.238	123.264	163891	239862	2002.92	3.23608	5.86979	6.60694	135.461	188.546	1838.06	194.315	77.0791	81.826	10.3076	11.8564	1.22211
			DT24-15	38.7933	39.8214	21.1989	0.1882	100.002	77.0033	1345.06	0.816274	191.407	114.555	161890	240132	1969.35	3.07341	5.96567	6.37435	130.134	186.686	1782.82	190.776	77.3151	82.205	10.3228	11.7843	1.21647
			DT24-16	38.5417	39.7077	21.2055	0.1881	99.643	76.9471	1344.34	0.815587	184.964	116.667	163680	239447	1998.71	3.12066	6.09115	6.73166	140.454	186.873	1841.62	193.133	77.0712	81.8927	10.3489	11.7994	1.22111
			DT24-21	38.5564	39.7856	21.2099	0.1922	99.7441	76.9782	1373.65	0.833191	205.477	138.204	162289	239917	2009.17	3.25516	6.11489	6.75217	144.392	187.18	1831.83	192.64	77.2561	80.7745	10.4296	11.8701	1.23801
			DT24-23	38.6198	39.6822	21.2456	0.1977	99.7453	76.9022	1412.95	0.855594	189.702	117.575	161476	239293	1964.74	3.10118	5.83255	6.48531	130.807	184.762	1805.79	193.874	77.2986	82.1869	10.1341	12.0064	1.21674
			DT24-24	38.7216	39.9114	21.2018	0.1899	100.025	77.0408	1357.21	0.823535	199.097	127.727	161160	240675	2009.11	2.92214	6.27675	6.5601	142.163	185.499	1784.19	194.891	77.4338	80.2145	10.3089	12.0931	1.24666
			DT24-25	38.7835	39.9402	21.2298	0.1865	100.14	77.0302	1332.91	0.807724	209.864	143.557	159155	240849	1966.83	3.32543	5.94286	6.52057	138.594	183.851	1793.76	195.668	77.6643	80.9198	10.0519	12.2942	1.23579
			DT24-26	38.7484	39.784	21.349	0.1867	100.068	76.8614	1334.34	0.804075	195.458	123.26	162084	239907	1970.47	3.02239	6.01686	6.424	140.881	185.692	1824.23	196.412	77.2777	82.2563	10.0323	12.118	1.21571
			DT24-31	38.8306	40.0821	21.2608	0.1863	100.36	77.0672	1331.48	0.805681	203.795	137.942	162043	241704	1969.21	3.06174	5.87596	6.3636	143.603	186.804	1834.25	198.408	77.4129	82.2882	9.92507	12.2441	1.21524
			DT24-33	38.5082	39.7224	21.2537	0.1883	99.6726	76.9134	1345.77	0.814602	210.611	136.877	162276	239535	1981.75	3.20103	5.89012	6.8549	149.006	187.857	1825.42	196.673	77.2296	81.8853	10.0763	12.1197	1.22122
			Average	38.6889	39.8176	21.2541	0.189864	99.9504	76.9549	1356.95	0.82135	201.939	131.461	162738	240109	1995.68	3.2447	6.08526	6.64438	141.309	186.989	1807.94	195.089	77.2215	81.5496	10.2306	11.9891	1.22632
			Std	0.139611	0.237506	0.160473	0.00347222	0.255756	0.228543	24.8158	0.0133581	11.8753	10.7584	1787.34	1432.22	26.3488	0.231656	0.201838	0.209607	5.76967	1.66355	51.1713	2.09994	0.252833	0.651406	0.167414	0.17544	0.00983934
	Tholeiitic basalts	DT05	DT5-2	38.6969	40.9702	19.2941	0.2139	99.1751	79.102	1528.73	1.01933	130.845	84.6167	147374	247060	1799.83	2.2165	6.04156	9.18042	231.623	193.093	2152.23	164.26	79.3896	81.8826	10.9572	11.1458	1.22126
			DT5-4	38.3439	39.384	21.3239	0.2183	99.2701	76.7022	1560.18	0.941276	136.004	94.1325	145942	237495	1761.61	1.52792	5.72029	7.85777	241.503	184.7	1823.14	160.582	78.8991	82.8458	10.9701	11.0032	1.20706
			DT5-5	38.8508	40.8926	19.5062	0.2126	99.4622	78.8892	1519.44	1.00212	135.597	85.666	150633	246592	1829.76	1.9475	6.16434	9.84691	241.135	192.778	2005.23	159.881	78.998	82.3241	11.4445	10.6139	1.21471
			DT5-6	39.3006	42.6345	17.1141	0.2079	99.2571	81.6199	1485.85	1.11694	195.551	100.45	129752	257096	1682.1	2.7726	4.89635	8.14638	206.932	171.9	2053.25	156.98	81.9911	77.1372	10.7153	12.0985	1.29639
			DT5-18	38.5252	39.5445	21.0993	0.2073	99.3763	76.9631	1481.56	0.903361	137.158	92.7034	144900	238463	1755.33	1.58929	6.03327	9.85185	250.103	185.232	1910.16	154.008	79.0855	82.5488	11.3977	10.6285	1.2114
			DT5-19	38.5992	40.307	20.3552	0.2163	99.4777	77.9238	1545.89	0.977037	153.818	96.888	148876	243061	1787.37	1.94388	6.92536	9.0822	268.759	193.095	2003.64	160.715	78.9534	83.293	11.1214	10.7952	1.20058
			DT5-20	38.7177	41.0511	19.4329	0.207	99.4087	79.016	1479.42	0.979406	126.505	88.6262	149045	247548	1732.83	1.64052	5.37707	8.98213	180.612	191.726	2262.65	152.271	79.2371	86.0121	11.3799	10.2165	1.16263
			DT5-21	38.6478	40.8278	19.6611	0.2197	99.3564	78.7306	1570.19	1.02743	147.284	91.9486	150881	246201	1796.79	2.14786	5.89943	8.74244	261.267	193.261	1992.54	159.415	78.9444	83.9723	11.2712	10.5656	1.19087
			DT5-24	38.8645	41.1135	19.4581	0.2096	99.6457	79.0197	1498	0.990423	133.025	92.9299	149952	247924	1764.89	1.32741	5.7687	9.36642	201.341	196.037	2290.56	154.937	79.1621	84.9638	11.3911	10.3324	1.17697
			DT5-25	38.5637	40.5351	19.879	0.2138	99.1916	78.424	1528.02	0.988879	146.808	107.018	149302	244436	1798.51	1.90889	6.93427	9.69143	247.574	193.826	2037.41	161.729	78.9996	83.0143	11.1206	10.8323	1.20461
			DT5-27	38.6028	40.5506	20.1974	0.2534	99.6042	78.1604	1811.04	1.15356	164.279	106.37	150091	244530	2078.47	4.59258	5.45145	8.0601	157.234	176.659	1365.75	180.857	78.9184	72.2123	11.4924	12.0498	1.3848
			DT5-28	38.6619	41.0117	19.3344	0.2028	99.2108	79.0843	1449.4	0.964422	127.698	82.432	148445	247310	1743.77	1.56442	5.58801	9.11428	183.715	193.871	2249.83	153.631	79.2876	85.1287	11.3504	10.3494	1.17469
			DT5-32	38.8552	40.9471	19.4476	0.2133	99.4632	78.9614	1524.45	1.00845	133.514	92.4758	150846	246921	1816.46	1.75885	5.98651	8.12888	198.804	193.697	2214.36	162.871	78.9966	83.0441	11.1527	10.7972	1.20418
			Average	38.71	40.7515	19.7003	0.215069	99.3769	78.6613	1537.09	1.00559	143.699	93.5583	147388	245741	1795.98	2.07217	5.90666	8.92702	220.815	189.221	2027.75	160.164	79.2971	82.183	11.2126	10.8791	1.21924
			Std	0.229738	0.793604	1.02151	0.0124906	0.152382	1.19375	89.2695	0.066629	19.0159	7.63472	5609.65	4785.62	93.515	0.844326	0.567487	0.694061	34.8307	7.46517	245.101	7.28125	0.82388	3.67985	0.230985	0.592296	0.0592793
		DT07	DT7-2	38.8409	40.8891	19.5596	0.2134	99.503	78.8422	1525.16	1.00315	132.523	88.5335	155296	246571	1822.19	1.03684	6.1544	9.58996	234.352	191.858	1960.84	174.057	78.4864	85.2247	10.469	11.2081	1.17337
			DT7-3	38.5265	40.4377	20.0445	0.2166	99.2253	78.2424	1548.03	0.993558	124.806	99.7959	149776	243849	1795.52	2.1565	6.0161	10.5512	226.232	190.627	2015.65	161.517	78.907	83.4166	11.1166	10.7839	1.1988
			DT7-11	38.7298	40.6784	19.8133	0.2132	99.4347	78.5395	1523.73	0.989374	128.893	97.7355	151337	245300	1822.01	1.79681	5.96351	8.06247	231.648	189.476	1906.83	161.779	78.833	83.0607	11.2623	10.6899	1.20394
			DT7-12	38.8673	40.6549	19.9067	0.2084	99.6373	78.4503	1489.43	0.962561	118.199	79.7349	148361	245159	1746.41	2.68506	5.28866	10.3019	188.725	191.375	2200.52	163.158	79.153	84.952	10.7038	10.9974	1.17713
			DT7-13	38.5072	40.9423	19.4718	0.209	99.1303	78.9388	1493.71	0.986893	143.972	89.6198	148057	246892	1778.4	2.14448	6.92369	9.41496	224.649	192.673	2152.84	154.059	79.3027	83.2531	11.5436	10.4054	1.20116
			DT7-19	38.7623	40.8075	19.5105	0.2134	99.2937	78.8508	1525.16	1.00567	146.838	102.456	148089	246079	1758.23	2.09358	6.08097	9.00361	239.479	191.003	1990.4	157.166	79.245	84.2262	11.1871	10.6129	1.18728
			DT7-20	38.4829	41.0258	19.3308	0.21	99.0495	79.0931	1500.86	0.998848	144.632	89.4683	147638	247395	1746.75	1.44093	5.99223	8.42698	201.993	194.815	2296.73	153.621	79.3825	84.5218	11.3705	10.4052	1.18313
			DT7-21	38.7349	41.0422	19.2303	0.2056	99.213	79.1857	1469.41	0.98303	146.431	87.727	146298	247494	1737.99	0.787327	5.49648	7.99693	193.571	192.48	2261.82	153	79.5379	84.1766	11.3594	10.4581	1.18798
			DT7-23	38.7683	41.0548	19.5641	0.2109	99.5981	78.9057	1507.29	0.991166	132.933	88.4013	148225	247570	1776.43	1.36403	5.75119	8.39137	219.861	194.01	2004.64	154.734	79.3291	83.4398	11.4806	10.4391	1.19847
			DT7-25	38.6779	40.4908	20.2066	0.2088	99.5841	78.1274	1492.28	0.950095	130.722	84.4205	145821	244169	1706.87	1.62899	5.47065	7.42811	182.969	191.635	2262.11	150.366	79.3705	85.4316	11.3514	10.3117	1.17053
			DT7-31	38.7318	41.0429	19.4641	0.2107	99.4495	78.9861	1505.86	0.995314	156.964	93.8581	147077	247498	1755.53	1.70881	6.29626	8.65798	240.08	191.712	2053.76	155.519	79.4516	83.7789	11.2882	10.574	1.19362
			DT7-27	38.8201	40.8503	19.7059	0.2075	99.5838	78.7017	1482.99	0.96817	138.654	88.3216	149483	246337	1773.87	1.4909	6.10565	7.99068	199.478	192.528	2054.01	155.065	79.1078	84.2693	11.4395	10.3735	1.18667
			DT7-32	38.8572	40.8719	19.5809	0.2179	99.5279	78.817	1557.32	1.02319	129.779	92.8648	147860	246467	1807.68	1.70519	5.69167	7.81813	238.886	193.716	1959.05	156.926	79.2963	81.7952	11.5193	10.6132	1.22256
			DT7-33	38.9294	40.6819	19.4212	0.2358	99.2683	78.8759	1685.25	1.11634	129.373	87.2113	145788	245321	1738.79	1.51483	6.04212	8.54413	182.375	191.015	2236.43	156.927	79.4511	83.8447	11.0802	10.764	1.19268
			DT7-35	38.7954	40.8485	19.209	0.2117	99.0646	79.1259	1513.01	1.01332	135.394	82.1914	145964	246326	1693.21	2.0846	5.20229	8.1744	183.871	195.725	2281.31	150.323	79.4981	86.2052	11.2638	10.2987	1.16002
			DT7-38	38.6815	40.8681	19.569	0.2161	99.3347	78.8256	1544.46	1.01535	128.029	90.0081	145980	246444	1756.81	1.87141	5.5116	7.60795	223.735	187.395	1969.89	153.665	79.5041	83.0938	11.4327	10.5265	1.20346
			DT7-39	38.744	40.6824	19.7478	0.2106	99.3848	78.5969	1505.15	0.98055	125.479	85.1556	152297	245324	1816.36	1.3413	5.88591	8.97121	228.424	193.747	1926.55	160.302	78.729	83.8476	11.3309	10.5256	1.19264
			Average	38.7328	40.8159	19.608	0.212918	99.3696	78.7709	1521.71	0.998622	134.919	89.8532	148432	246129	1766.65	1.69715	5.8749	8.64306	214.137	192.105	2090.2	157.187	79.2109	84.0316	11.247	10.5875	1.1902
			Std	0.127295	0.187536	0.271366	0.00676676	0.191183	0.296535	48.3618	0.0357903	9.96952	5.99751	2585.68	1130.89	37.9845	0.459777	0.418669	0.896896	21.7317	2.01025	139.182	5.75151	0.304468	1.04885	0.283412	0.244034	0.0148448
		DT08	DT8-1	38.4857	40.1186	20.7979	0.2169	99.6191	77.4698	1550.18	0.958893	139.26	82.6046	155520	241925	1803.18	0.531895	6.35617	8.12874	211.161	197.614	1416.01	139.979	78.1388	86.2476	12.8818	9.00074	1.15945
			DT8-3	38.6497	39.7596	21.0161	0.2208	99.6462	77.1289	1578.05	0.965999	121.876	79.1137	156901	239760	1820.09	1.22519	6.28073	9.5353	221.053	197.136	1372.38	148.884	77.8326	86.2051	12.2249	9.48903	1.16002
			DT8-5	38.6893	40.4356	20.379	0.2223	99.7262	77.9585	1588.77	1.00297	144.484	81.3557	160122	243836	1836.78	1.5828	7.01252	11.655	239.436	199.715	1424.53	150.726	77.7729	87.1754	12.1862	9.41322	1.14711
			DT8-6	38.3535	39.523	21.4026	0.22	99.4991	76.6994	1572.33	0.945118	133.798	78.4656	158115	238333	1801.15	1.82723	6.94324	10.113	192.859	198.056	1465.81	145.73	77.5958	87.7857	12.3595	9.21673	1.13914
			DT8-7	38.5628	40.0866	20.4684	0.2222	99.34	77.7335	1588.05	0.998137	131.137	78.1935	157862	241732	1791.09	0.529254	6.57463	8.56601	154.287	200.857	1494.32	145.321	77.8686	88.1372	12.325	9.20561	1.13459
			DT8-8	38.5436	40.1774	20.8262	0.2208	99.768	77.4716	1578.05	0.974808	143.262	84.9802	157883	242279	1837.54	1.60746	6.34928	10.1143	216.283	200.594	1420.56	147.5	77.9052	85.921	12.4579	9.34235	1.16386
			DT8-9	38.5944	39.9249	20.591	0.2262	99.3365	77.5597	1616.64	1.01006	137.579	79.7449	158397	240757	1848.18	0.814077	6.58881	11.2321	231.004	197.26	1373.02	143.728	77.7404	85.7043	12.8589	9.07391	1.1668
			DT8-11	38.4935	39.9538	20.8209	0.2204	99.4886	77.3785	1575.19	0.973289	128.214	77.42	159520	240931	1855.23	1.07052	6.42623	8.43406	211.933	199.186	1424.2	148.016	77.6304	85.9841	12.534	9.27882	1.16301
			DT8-13	38.5133	40.1041	20.5171	0.2237	99.3582	77.6999	1598.77	1.00249	139.388	76.7889	154769	241837	1789.68	1.25025	6.41584	10.905	194.961	196.901	1469.17	139.54	78.2152	86.4784	12.8256	9.01604	1.15636
			DT8-16	38.5254	40.1176	20.5531	0.2206	99.4167	77.6753	1576.62	0.986866	123.135	75.9173	163738	241919	1867.88	0.674043	6.3156	11.3798	202.121	203.464	1482.74	157.207	77.2459	87.6598	11.8817	9.60112	1.14077
			DT8-18	38.4795	40.2744	20.4359	0.2245	99.4143	77.8417	1604.49	1.01007	135.707	76.179	156488	242864	1835.29	1.3534	6.47812	8.63463	208.349	200.133	1431.55	143.424	78.0989	85.2661	12.7962	9.16518	1.1728
			DT8-32	38.5564	40.292	20.3184	0.2186	99.3854	77.9485	1562.33	0.989215	126.081	78.4106	158858	242970	1816.97	1.76709	6.29771	11.077	202.524	201.181	1471.97	149.485	77.8483	87.4303	12.1549	9.40994	1.14377
			DT8-33	38.4471	40.2242	20.3482	0.2214	99.2409	77.8943	1582.34	1.00042	151.998	87.9137	157529	242561	1828.09	0.962022	6.55405	8.90014	218.518	204.799	1468.95	141.201	77.9639	86.1717	12.9467	8.96345	1.16047
			DT8-34	38.6732	40.2601	20.3707	0.2235	99.5275	77.8907	1597.35	1.00879	142.185	81.0472	154735	242778	1778.34	1.73614	6.24714	9.8837	210.223	197.912	1433.82	137.403	78.285	87.0112	12.9425	8.87989	1.14928
			DT8-38	38.6615	40.3032	20.4757	0.2225	99.6629	77.8205	1590.2	0.999128	131.248	75.5088	157627	243038	1827.03	1.23049	6.28688	10.0086	213.521	201.822	1411.55	144.707	77.9869	86.275	12.6257	9.18038	1.15908
			Average	38.5486	40.1037	20.6214	0.221627	99.4953	77.6114	1583.96	0.988416	135.29	79.5763	157871	241835	1822.43	1.21079	6.47513	9.90449	208.549	199.775	1437.37	145.523	77.8753	86.6302	12.5334	9.21576	1.15444
			Std	0.0935766	0.23448	0.300301	0.00233986	0.158707	0.346082	16.7229	0.0203213	8.49844	3.50363	2260.46	1413.97	25.7949	0.442082	0.232227	1.17542	19.4062	2.39016	37.293	5.07248	0.265847	0.848273	0.337166	0.208139	0.0112725
		DT10	DT10-31	38.4709	39.9241	20.7821	0.2289	99.406	77.3981	1635.94	1.01271	157.357	95.7668	156377	240752	1832.41	1.116	7.27959	10.2068	228.706	196.911	1318.9	139.755	77.9613	85.3395	13.1116	8.93704	1.17179
			DT10-32	38.2446	39.8798	20.6701	0.2219	99.0164	77.4732	1585.91	0.987062	139.033	82.724	159514	240485	1852.65	1.65079	6.11446	8.35147	176.86	204.036	1429.7	142.914	77.5989	86.1006	12.9633	8.95936	1.16143
			DT10-34	38.6955	40.2983	20.5458	0.2234	99.763	77.7593	1596.63	0.999747	147.651	78.643	155858	243008	1803.93	1.48584	6.23783	8.28141	194.161	198.148	1408.79	141.546	78.1779	86.3993	12.7445	9.08173	1.15742
			DT10-36	38.5051	40.0424	20.6934	0.2254	99.4663	77.5245	1610.92	1.0015	138.03	81.3708	158468	241465	1838.26	1.23974	6.28003	8.48403	210.111	199.241	1387.7	143.747	77.7834	86.2056	12.7882	9.07102	1.16002
			DT10-40	38.5343	40.1381	20.825	0.2233	99.7207	77.4555	1595.92	0.985902	138.526	77.3395	156877	242042	1842.8	1.04027	6.40576	8.87063	215.095	199.432	1366.08	142.594	77.9983	85.1298	12.9234	9.08954	1.17468
			DT10-43	38.3459	39.9172	20.8946	0.2263	99.384	77.3005	1617.36	0.995819	137.323	86.5687	157022	240710	1818.27	1.21456	6.20043	8.72308	203.496	199.055	1394.63	142.828	77.8875	86.3583	12.7305	9.09603	1.15797
			DT10-44	38.6474	40.1621	20.6192	0.225	99.6537	77.6389	1608.07	1.00332	135.128	75.7665	159393	242187	1837.84	1.7787	6.17714	9.23407	187.901	205.365	1491.66	144.286	77.7345	86.7284	12.7375	9.05222	1.15303
			DT10-46	38.612	39.8034	21.0353	0.2246	99.6753	77.1322	1605.21	0.981727	137.481	75.4547	157609	240024	1809.11	1.07711	6.39241	9.46236	203.077	198.966	1398.41	140.945	77.7739	87.1196	12.8356	8.94269	1.14785
			DT10-47	38.5188	40.0598	20.7309	0.2241	99.5336	77.5005	1601.63	0.993925	145.202	86.0112	160545	241570	1863.21	1.34411	6.32822	9.88474	215.106	202.387	1399.21	141.961	77.5652	86.1657	13.1248	8.84243	1.16055
			DT10-48	38.3748	40.0057	20.6007	0.224	99.2052	77.5867	1600.92	0.99976	138.503	78.749	160074	241244	1827.7	1.40879	6.30253	8.84551	202.374	201.916	1431.3	141.604	77.5928	87.5822	12.9072	8.84613	1.14179
			DT10-49	38.3988	40.0677	20.4988	0.2219	99.1872	77.6996	1585.91	0.995311	136.935	78.7748	158099	241618	1811.21	0.969396	5.89185	8.59585	184.886	202.008	1475.88	139.998	77.8346	87.289	12.9374	8.8551	1.14562
			DT10-50	38.5339	40.0521	20.6546	0.2231	99.4637	77.5614	1594.49	0.993145	134.723	77.206	160909	241524	1842.84	1.27532	6.11519	8.52173	184.827	202.289	1429.43	143.465	77.5224	87.3158	12.8452	8.91593	1.14527
			Average	38.4902	40.0292	20.7125	0.224325	99.4563	77.5025	1603.24	0.995828	140.491	81.1979	158395	241386	1831.69	1.30005	6.31045	8.95514	200.55	200.813	1410.97	142.137	77.7859	86.4778	12.8874	8.9741	1.15645
			Std	0.131348	0.135681	0.152368	0.00195035	0.232333	0.172229	13.9391	0.0084722	6.52058	5.86459	1689.94	818.187	18.2351	0.247232	0.336191	0.61763	15.3166	2.55166	46.1523	1.43334	0.198981	0.768792	0.134318	0.0995958	0.0103056
		DT12	DT12-1	38.7954	40.3052	20.1887	0.2241	99.5134	78.064	1601.63	1.02062	145.276	75.4529	154508	243050	1794.06	0.947997	6.04527	8.52285	207.291	195.951	1417.75	140.902	78.329	86.1217	12.7327	9.1194	1.16115
			DT12-2	38.5626	40.1569	20.2434	0.2249	99.1878	77.9543	1607.35	1.02149	148.658	86.7245	154921	242156	1795.43	1.33175	6.36337	8.97838	209.186	198.314	1410.47	140.027	78.2208	86.2866	12.822	9.03863	1.15893
			DT12-3	38.7952	40.3771	20.0699	0.224	99.4662	78.1953	1600.92	1.0262	159.475	81.8799	154494	243483	1778.47	1.32852	6.1601	9.14753	221.986	196.493	1435.34	138.52	78.3607	86.8691	12.8391	8.96604	1.15116
			DT12-4	38.8572	40.3555	20.2034	0.2288	99.6449	78.0729	1635.22	1.04127	132.564	72.7853	158757	243353	1825.26	0.91767	6.13075	8.71749	209.428	200.265	1422.34	139.981	77.8864	86.9779	13.0393	8.81731	1.14972
			DT12-5	38.6132	40.146	20.1244	0.2246	99.1082	78.0508	1605.21	1.02616	143.003	74.3125	155323	242090	1777.76	0.907534	5.97347	11.4991	202.011	196.925	1410.38	141.234	78.172	87.3702	12.5873	9.09293	1.14455
			DT12-7	38.7209	39.753	20.8849	0.2298	99.5886	77.2363	1642.37	1.01169	136.395	84	155555	239720	1798.45	1.01332	6.29513	8.32679	207.545	193.855	1381.47	147.365	77.9781	86.4936	12.2041	9.47351	1.15615
			DT12-8	38.6073	40.2099	20.0924	0.2256	99.1352	78.1053	1612.35	1.03237	146.14	79.0036	157396	242475	1803.34	1.18187	6.32906	8.53334	210.357	199.428	1459.24	143.06	77.9723	87.2802	12.6055	9.08917	1.14574
			DT12-9	38.7305	40.3235	20.3353	0.228	99.6173	77.9476	1629.51	1.03089	146.838	83.7643	156308	243160	1802.56	1.48315	6.44484	10.2016	223.334	196.147	1391.54	142.855	78.1395	86.7142	12.6181	9.13933	1.15321
			DT12-10	38.5641	39.8053	20.801	0.2282	99.3986	77.33	1630.94	1.0087	151.301	82.1958	154435	240035	1766.01	1.46533	6.26481	8.23484	211.621	192.364	1361.88	139.846	78.1244	87.4488	12.6282	9.05531	1.14353
			DT12-11	38.6959	40.207	20.2898	0.2291	99.4218	77.9364	1637.37	1.03819	147.558	83.951	157153	242458	1829.29	1.16347	6.52599	11.2183	221.711	196.432	1317.61	143.773	77.9975	85.9094	12.7234	9.1486	1.16402
			DT12-20	38.1125	39.5401	20.1842	0.2332	98.07	77.7379	1666.67	1.0623	152.009	88.6378	152439	238436	1747.89	1.14219	6.74792	8.73121	209.175	191.059	1386.6	136.342	78.2323	87.2132	12.8199	8.94405	1.14662
			DT12-22	38.5891	40.2101	20.3288	0.2252	99.3532	77.9047	1609.5	1.01856	152.86	84.561	157249	242476	1798.35	0.788836	6.20912	8.66804	227.013	199.483	1388.3	141.865	77.9884	87.4409	12.6765	9.02166	1.14363
			DT12-23	38.7777	40.3672	20.2252	0.2305	99.6006	78.0594	1647.37	1.04787	135.095	72.437	154480	243424	1800.3	1.07219	5.83862	7.80796	179.458	198.766	1470.02	139.521	78.358	85.8082	12.9034	9.03164	1.16539
			DT12-25	38.1518	38.4485	22.239	0.2353	99.0746	75.501	1681.68	0.972829	140.746	76.863	149894	231853	1717.83	1.41316	6.03628	8.19374	220.006	190.854	1321.7	136.059	78.0417	87.2579	12.6256	9.07705	1.14603
			DT12-27	38.4913	40.1218	20.327	0.2327	99.1728	77.8684	1663.1	1.05257	154.012	81.216	159550	241944	1823.59	1.04522	6.71694	8.5221	202.482	201.507	1455.9	140.865	77.7	87.4919	12.9457	8.82892	1.14296
			DT12-28	38.7446	40.0808	20.3847	0.2289	99.439	77.8018	1635.94	1.03246	139.452	77.8029	156172	241697	1808.73	1.42325	6.25427	11.4584	233.88	193.476	1332.83	144.563	78.0511	86.3432	12.5117	9.25667	1.15817
			Average	38.6131	40.0255	20.4326	0.228306	99.2995	77.7354	1631.7	1.02776	145.711	80.3492	155540	241363	1791.71	1.16409	6.271	9.1726	212.28	196.332	1397.71	141.049	78.097	86.8142	12.7052	9.06876	1.15193
			Std	0.213919	0.483511	0.532432	0.00345533	0.380313	0.651397	24.6951	0.0206179	7.47246	4.98152	2349.61	2915.69	29.0855	0.221668	0.251885	1.21778	12.6654	3.26636	47.1508	2.91125	0.18107	0.582529	0.197926	0.156132	0.00774974
		DT13	DT13-2	38.9051	40.7507	19.5722	0.216	99.444	78.7748	1543.74	1.01471	142.001	67.7732	147932	245736	1687.5	0.792614	5.35237	9.55235	235.703	189.114	1846.71	142.434	79.2396	87.6633	11.8476	9.62838	1.14073
			DT13-7	38.6518	40.531	19.8957	0.2139	99.2924	78.408	1528.73	0.988511	143.154	72.4101	148962	244411	1727.71	0.810144	5.56254	9.07821	243.019	191.77	1852.27	138.815	79.0357	86.2196	12.4461	9.31879	1.15983
			DT13-8	38.843	40.9811	19.4902	0.2225	99.5368	78.9388	1590.2	1.04965	138.738	65.0741	152727	247126	1795.32	1.35542	5.6778	8.20208	251.98	193.766	1789.24	143.714	78.8042	85.0693	12.4923	9.40988	1.17551
			DT13-9	38.591	40.1277	20.3264	0.2179	99.263	77.8714	1557.32	0.985659	140.645	71.4698	148009	241979	1698.31	1.48054	5.72011	8.28785	243.594	191.065	1808.73	139.836	78.9764	87.1506	12.145	9.44785	1.14744
			DT13-12	38.6513	40.7064	19.6273	0.2174	99.2024	78.7096	1553.75	1.01842	150.743	76.3748	149478	245469	1738.63	1.6778	5.59167	9.45045	255.694	195.289	1829.93	143.625	79.05	85.9749	12.1053	9.60844	1.16313
			DT13-13	38.6731	40.5525	19.9338	0.2208	99.3802	78.3846	1578.05	1.01845	142.15	72.966	155514	244541	1792.07	1.25237	5.79955	11.3118	258.451	192.178	1771.15	151.923	78.3227	86.7785	11.7959	9.76911	1.15236
			DT13-15	38.8383	40.8332	19.4761	0.2183	99.3659	78.8907	1560.18	1.03058	144.941	69.4566	152035	246234	1760.72	0.425397	5.95783	9.13385	249.678	194.136	1846.76	145.465	78.8197	86.348	12.1041	9.56784	1.1581
			DT13-17	38.9114	40.8632	19.6914	0.218	99.684	78.7193	1558.04	1.01791	136.973	65.4708	150222	246415	1727.6	1.53641	5.73309	10.0374	237.158	189.916	1848.1	142.487	79.0314	86.954	12.1246	9.48513	1.15003
			DT13-20	38.8904	40.838	19.5112	0.2142	99.4538	78.8627	1530.88	1.0094	147.204	70.497	151355	246263	1724.65	0.790969	6.06861	9.74309	250.908	192.039	1848.64	144.104	78.8964	87.7598	11.9681	9.52091	1.13947
			DT13-21	38.9192	40.8489	19.5597	0.2155	99.5433	78.8257	1540.17	1.01301	140.055	72.2748	151003	246328	1739.96	1.34982	5.9018	10.8947	244.835	192.958	1830.15	146.077	78.9395	86.7854	11.9113	9.67375	1.15227
			DT13-25	38.7425	40.3799	20.1	0.2129	99.4353	78.1709	1521.59	0.973889	158.225	69.8599	146546	243500	1701.64	1.61091	5.78279	9.91825	254.212	189.81	1827.82	133.901	79.244	86.1205	12.7082	9.13709	1.16116
			DT13-26	38.8756	40.8721	19.4708	0.2132	99.4317	78.9111	1523.73	1.00678	143.835	70.3853	153746	246468	1747.22	1.29502	5.93711	8.42578	239.568	196.658	1867.45	139.465	78.6482	87.9951	12.528	9.0711	1.13643
			DT13-28	38.8425	40.8152	19.6049	0.215	99.4776	78.7733	1536.6	1.00833	146.953	72.9526	148051	246125	1724.27	1.28386	5.9997	8.36583	244.005	191.577	1823.34	137.133	79.2523	85.8628	12.5738	9.26254	1.16465
			DT13-29	38.819	40.7545	19.5531	0.2189	99.3455	78.7927	1564.47	1.02934	144.678	70.3155	150545	245759	1747.68	1.32592	5.87165	10.9978	242.268	190.195	1805.13	146.003	78.9515	86.1401	11.9702	9.69828	1.1609
			DT13-31	38.602	40.2335	20.181	0.2172	99.2337	78.04	1552.32	0.989571	147.404	83.0999	149313	242617	1717.03	0.551171	6.18775	9.92904	248.389	189.323	1803.44	147.248	78.8743	86.96	11.6608	9.86174	1.14995
			DT13-32	38.716	40.8281	19.53	0.2164	99.2905	78.8426	1546.6	1.01879	149.947	78.5627	149479	246203	1726.9	1.40151	6.55087	8.95541	250.166	190.788	1848.8	140.383	79.0993	86.5591	12.3013	9.39152	1.15528
			Average	38.7795	40.6823	19.7202	0.216756	99.3988	78.6198	1549.15	1.01081	144.853	71.8089	150307	245324	1734.83	1.18374	5.85595	9.51774	246.852	191.911	1827.98	142.663	78.9491	86.6463	12.1677	9.49077	1.1542
			Std	0.116546	0.247976	0.277293	0.00267531	0.128205	0.337078	19.1203	0.0190817	5.263	4.57832	2362.93	1495.35	29.8207	0.384091	0.278274	0.979144	6.63723	2.18311	26.2964	4.37568	0.236672	0.772034	0.309862	0.22097	0.0102861
